# Supplementary material for: Reactivity and Stability of a Ring-Expanded N-Heterocyclic Carbene Copper(I) Boryl Imidinate
Source: MDPI journal article supplement (doi:10.3390/inorganics10090135), 2022-09-07
Supplement: s1 [file s1]

## Supplementary Information for

### Reactivity and Stability of a Ring-Expanded N-Heterocyclic Carbene Copper(I) Boryl Imidinate

Rex S. C. Charman, Thomas M. Horsley Downie, Thomas H. Jerome, Mary F. Mahon, David J. Liptrot

Department of Chemistry, University of Bath, Claverton Down, Bath, BA2 7AY, UK.

|                                                                    |           |
|--------------------------------------------------------------------|-----------|
| <b>Experimental</b>                                                | <b>2</b>  |
| Reaction of <b>1</b> and H <sub>2</sub>                            | 2         |
| <b>X-ray Crystallography</b>                                       | <b>3</b>  |
| Table 1. Crystal data and structure refinement details             | 4         |
| <b><i>In situ</i> reaction monitoring by NMR spectroscopy</b>      | <b>5</b>  |
| Figures S1-3: Reaction of compound <b>1</b> and H <sub>2</sub> O   | 5         |
| Figures S4, S5: Thermolysis of compound <b>1</b>                   | 6         |
| Figures S6, S7: Reaction of compound <b>1</b> and phenyl acetylene | 7         |
| Figures S8: Reaction of compound <b>1</b> and H <sub>2</sub>       | 8         |
| <b>NMR Spectra of Compounds <b>2</b> and <b>3</b></b>              | <b>9</b>  |
| Figures S9-S10: NMR spectra of compound <b>2</b>                   | 9         |
| Figures S11-S12: NMR spectra of compound <b>3</b>                  | 10        |
| <b>Mass Spectrometry Data</b>                                      | <b>11</b> |
| Mass spectrum of compound <b>1</b> ·H <sub>2</sub> O               | 11        |
| Mass spectrum of compound <b>2</b>                                 | 12        |
| Mass spectrum of the reaction of compound <b>1</b> and PhCCH       | 13        |
| <b>IR Spectroscopy Data</b>                                        | <b>11</b> |
| IR spectrum of compound <b>3</b>                                   | 14        |
| <b>References</b>                                                  | <b>15</b> |

## Experimental

### Addition of H<sub>2</sub> to compound 1

In a vial in a glovebox, a solution of (6-Dipp)CuO<sup>t</sup>Bu (30 mg, 0.055 mmol) in C<sub>6</sub>H<sub>6</sub> (0.5 mL) was added to B<sub>2</sub>pin<sub>2</sub> (14 mg, 0.055 mmol). Volatiles were removed *in vacuo* precipitating a white powder. The powder was washed with hexane (2 mL) and dried *in vacuo*. The remaining solid was redissolved in C<sub>6</sub>H<sub>6</sub> (0.5 mL) was added and then <sup>t</sup>BuNC (12.5 μL, 0.111 mmol) was added forming a yellow solution. Volatiles were removed *in vacuo* precipitating a yellow powder. The solid was re-dissolved into C<sub>6</sub>D<sub>6</sub> (0.5 mL) and the reaction mixture was transferred to J. Young's tap NMR tube. The reaction mixture was degassed, and the NMR tube was charged with an atmosphere of H<sub>2</sub>. <sup>1</sup>H and <sup>11</sup>B NMR spectra were taken confirming no reaction.

## X-ray crystallography

The crystals were kept at 150.00(10) K during data collection. Compounds **2** and **3** were collected with a New Xcalibur EosS2 diffractometer with Mo source ( $\lambda = 0.71073$ ).

Compounds **1** and **1·H<sub>2</sub>O** were collected on RIGAKU SuperNova with Cu source ( $\lambda = 1.54184$ ). Using Olex2,<sup>1</sup> the structures were solved with the SHELXT<sup>2</sup> and refined with the ShelXL<sup>2</sup> refinement package using Least Squares minimisation.

Despite copious recrystallisation efforts, it proved impossible to obtain data that would be of publication standard for the structure of compound **1**. What was achievable, however, was a ball and stick drawing of the molecule (Figure 1(a)). This solution was brokered in space-group *Pca*2<sub>1</sub> (no. 29) with  $a = 17.5013(4)$  Å,  $b = 10.9111(5)$  Å,  $c = 20.7799(4)$  Å. There were 7337 unique data with a respectable  $R_{\text{int}}$  of 0.0544 and the final  $R_1$  obtained was in the region of 8%. While, at first glance, this seems acceptable for a sample of non-optimal quality, the problems run deeper. Extensive diffuse scattering is evident in the raw frames of data, at relatively low resolutions (2 - 24 Å). Additionally, the ADPs at 30% were anomalously large, another indication of something awry. Multiple integrations in lower symmetries followed by solution/refinement failed to flush out twinning. Lastly, the esds relating to the bond distance in the Figure are evidence for the problems that were present with this sample. As such, we make no deductions whatsoever from these metrics.

One molecule of the copper complex is partnered with one molecule of toluene in the asymmetric unit pertaining to the structure of **1·H<sub>2</sub>O**. C15 and C16 in the latter were treated for 50:50 disorder, while the whole of the solvent moiety was modelled to take account of 85:15 disorder. Distance and ADP restraints were employed, on merit, in disordered regions to assist convergence. H1 and H3 were located and refined subject to being 0.90 Å from the relevant parent atoms.

The asymmetric unit comprises half of a molecule in the structure of compound **2**. Atoms Cu1, C2, C16 and N2 are located on a mirror plane, intrinsic to the space-group.

The phenyl ring based on C31 was treated for 50:50 disorder in the structure of compound **3**. Each component was refined as a rigid hexagon with the addition of some ADP restraints.

**Table S1.** Crystal data and structure refinement details.

| Identification code                                                            | <b>1</b>                                                         | <b>1·H<sub>2</sub>O</b>                                             | <b>2</b>                                                            | <b>3</b>                                                            |
|--------------------------------------------------------------------------------|------------------------------------------------------------------|---------------------------------------------------------------------|---------------------------------------------------------------------|---------------------------------------------------------------------|
| Empirical formula                                                              | C <sub>39</sub> H <sub>61</sub> BCuN <sub>3</sub> O <sub>2</sub> | C <sub>46</sub> H <sub>71</sub> BCuN <sub>3</sub> O <sub>3</sub>    | C <sub>29</sub> H <sub>40</sub> CuN <sub>3</sub>                    | C <sub>36</sub> H <sub>45</sub> CuN <sub>2</sub>                    |
| Formula weight                                                                 | 678.25                                                           | 788.40                                                              | 494.18                                                              | 569.28                                                              |
| Crystal system                                                                 | orthorhombic                                                     | monoclinic                                                          | orthorhombic                                                        | orthorhombic                                                        |
| Space group                                                                    | Pca2 <sub>1</sub>                                                | P2 <sub>1</sub> /n                                                  | Pnma                                                                | P2 <sub>1</sub> 2 <sub>1</sub> 2 <sub>1</sub>                       |
| <i>a</i> / Å                                                                   | 17.4988(4)                                                       | 13.3551(1)                                                          | 15.5618(4)                                                          | 13.0160(3)                                                          |
| <i>b</i> / Å                                                                   | 10.9109(4)                                                       | 19.9750(2)                                                          | 21.0016(4)                                                          | 13.4045(3)                                                          |
| <i>c</i> / Å                                                                   | 20.7863(4)                                                       | 17.1177(2)                                                          | 8.5339(2)                                                           | 18.1677(3)                                                          |
| $\alpha$ / °                                                                   | 90                                                               | 90                                                                  | 90                                                                  | 90                                                                  |
| $\beta$ / °                                                                    | 90                                                               | 95.775(1)                                                           | 90                                                                  | 90                                                                  |
| $\gamma$ / °                                                                   | 90                                                               | 90                                                                  | 90                                                                  | 90                                                                  |
| Volume/ Å <sup>3</sup>                                                         | 3968.67(19)                                                      | 4543.28(8)                                                          | 2789.07(11)                                                         | 3169.77(11)                                                         |
| <i>Z</i>                                                                       | 4                                                                | 4                                                                   | 4                                                                   | 4                                                                   |
| <i>r</i> <sub>calc</sub> / g cm <sup>-3</sup>                                  | 1.135                                                            | 1.153                                                               | 1.177                                                               | 1.193                                                               |
| $\mu$ / mm <sup>-1</sup>                                                       | 1.026                                                            | 0.979                                                               | 0.803                                                               | 0.714                                                               |
| <i>F</i> (000)                                                                 | 1464.0                                                           | 1704.0                                                              | 1056.0                                                              | 1216.0                                                              |
| Crystal size/ mm <sup>3</sup>                                                  | 0.242 × 0.147 ×<br>0.135                                         | 0.311 × 0.219 ×<br>0.12                                             | 0.511 × 0.335<br>× 0.232                                            | 0.46 × 0.425 ×<br>0.315                                             |
| Radiation                                                                      | Cu K $\alpha$ ( $\lambda$ =<br>1.54184)                          | Cu K $\alpha$ ( $\lambda$ =<br>1.54184)                             | Mo K $\alpha$ ( $\lambda$ =<br>0.71073)                             | Mo K $\alpha$ ( $\lambda$ =<br>0.71073)                             |
| 2 $\theta$ range for data<br>collection/°                                      | 8.104 to 147.4                                                   | 6.82 to 146.454                                                     | 5.78 to 60.688                                                      | 6.078 to<br>60.594                                                  |
| Index ranges                                                                   | -21 ≤ <i>h</i> ≤ 21, -12 ≤<br><i>k</i> ≤ 13, -25 ≤ <i>l</i> ≤ 17 | -16 ≤ <i>h</i> ≤ 12,<br>-24 ≤ <i>k</i> ≤ 23,<br>-20 ≤ <i>l</i> ≤ 21 | -22 ≤ <i>h</i> ≤ 12,<br>-28 ≤ <i>k</i> ≤ 29,<br>-12 ≤ <i>l</i> ≤ 10 | -13 ≤ <i>h</i> ≤ 17,<br>-18 ≤ <i>k</i> ≤ 18,<br>-24 ≤ <i>l</i> ≤ 24 |
| Reflections collected                                                          | 53017                                                            | 46145                                                               | 26374                                                               | 34594                                                               |
| Independent<br>reflections, <i>R</i> <sub>int</sub>                            | 6548, 0.0460,                                                    | 9072, 0.0298                                                        | 3959, 0.0267                                                        | 8491, 0.0342                                                        |
| Data/restraints/paramet<br>ers                                                 | 6548/78/506                                                      | 9072/245/571                                                        | 3959/0/161                                                          | 8491/127/378                                                        |
| Goodness-of-fit on <i>F</i> <sup>2</sup>                                       | 1.034                                                            | 1.033                                                               | 1.030                                                               | 1.038                                                               |
| Final <i>R</i> 1, <i>wR</i> 2 indexes<br>[ <i>I</i> ≥ 2 $\sigma$ ( <i>I</i> )] | 0.0782, 0.2323                                                   | 0.0325, 0.0851                                                      | 0.0333, 0.0841                                                      | 0.0320, 0.0656                                                      |
| Final <i>R</i> 1, <i>wR</i> 2 indexes<br>[all data]                            | 0.0857, 0.2475                                                   | 0.0357, 0.0879                                                      | 0.0403, 0.0880                                                      | 0.0399, 0.0687                                                      |
| Largest diff. peak/hole /<br>e Å <sup>-3</sup>                                 | 0.64/-0.57                                                       | 0.28/-0.43                                                          | 0.37/-0.25                                                          | 0.35/-0.25                                                          |
| Flack parameter                                                                | 0.94(8)                                                          | -                                                                   | -                                                                   | -0.001(4)                                                           |
| CCDC code                                                                      | n/a                                                              | 2201279                                                             | 2201280                                                             | 2201281                                                             |

## In situ reaction monitoring by NMR spectroscopy

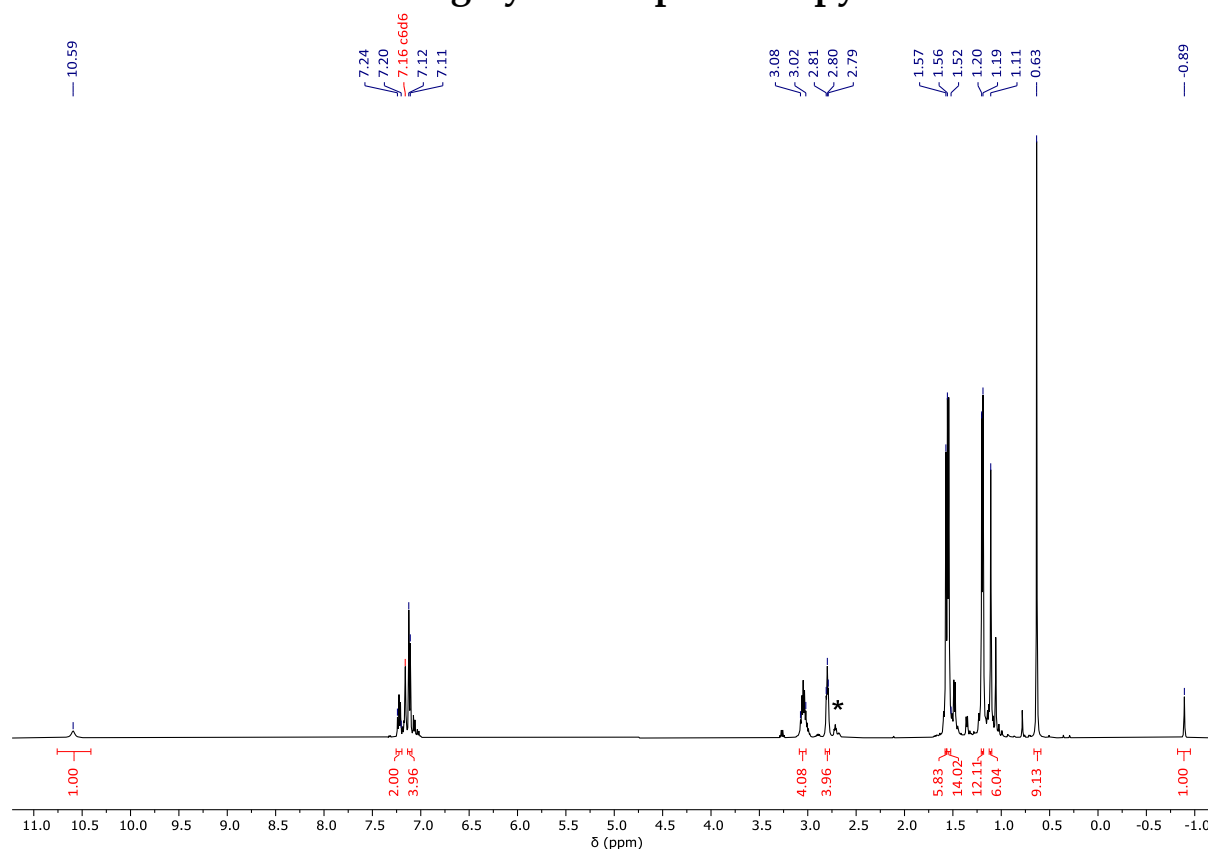

**Figure S1.** The  $^1\text{H}$  NMR spectrum (500 MHz,  $\text{C}_6\text{D}_6$ ) of the reaction of compound **1** with  $\text{H}_2\text{O}$ .  
 \* = Approx. 17 % (6-Dipp)CuOBpin impurity.

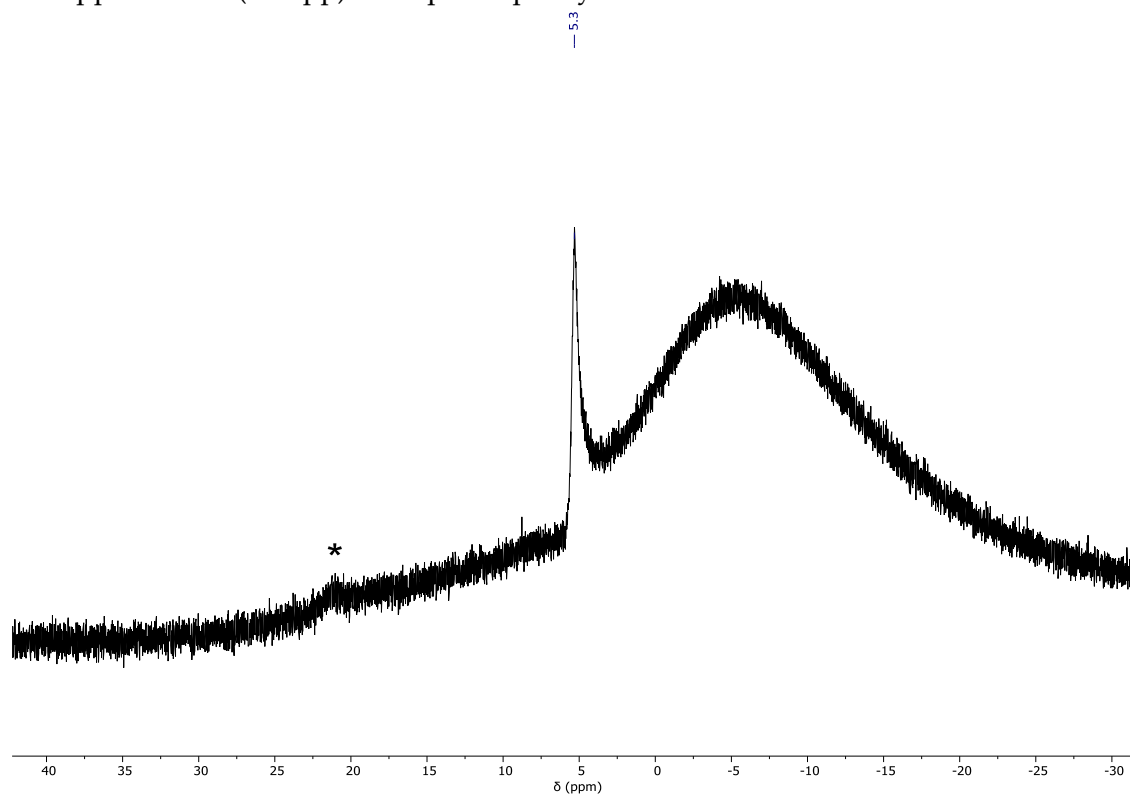

**Figure S2.** The  $^{11}\text{B}$  NMR spectrum (160 MHz,  $\text{C}_6\text{D}_6$ ) of the reaction of compound **1** with  $\text{H}_2\text{O}$ .  
 \* = Approx. 17 % (6-Dipp)CuOBpin impurity.

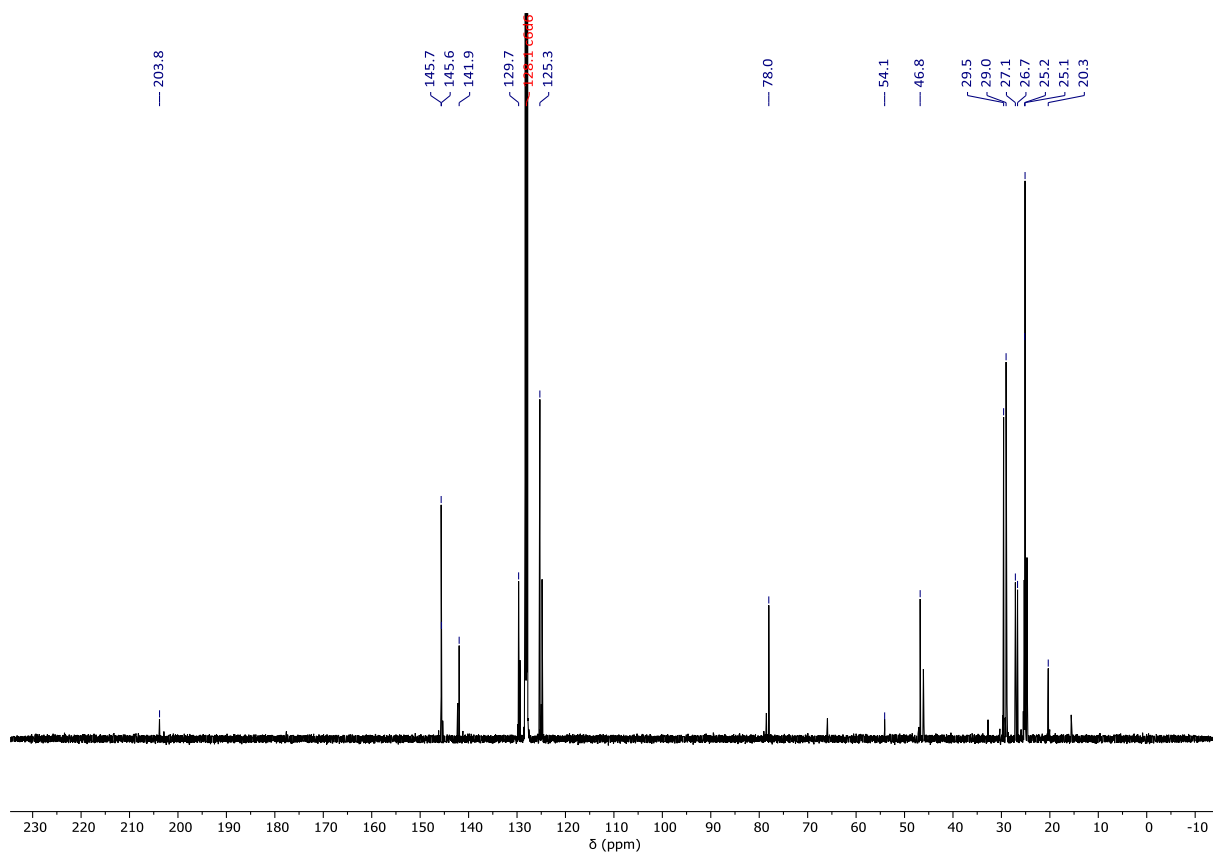

**Figure S3.** The  $^{13}\text{C}\{^1\text{H}\}$  NMR spectrum (126 MHz,  $\text{C}_6\text{D}_6$ ) of the reaction of compound **1** with  $\text{H}_2\text{O}$ . Approx. 17 % (6-Dipp)CuOBpin impurity.

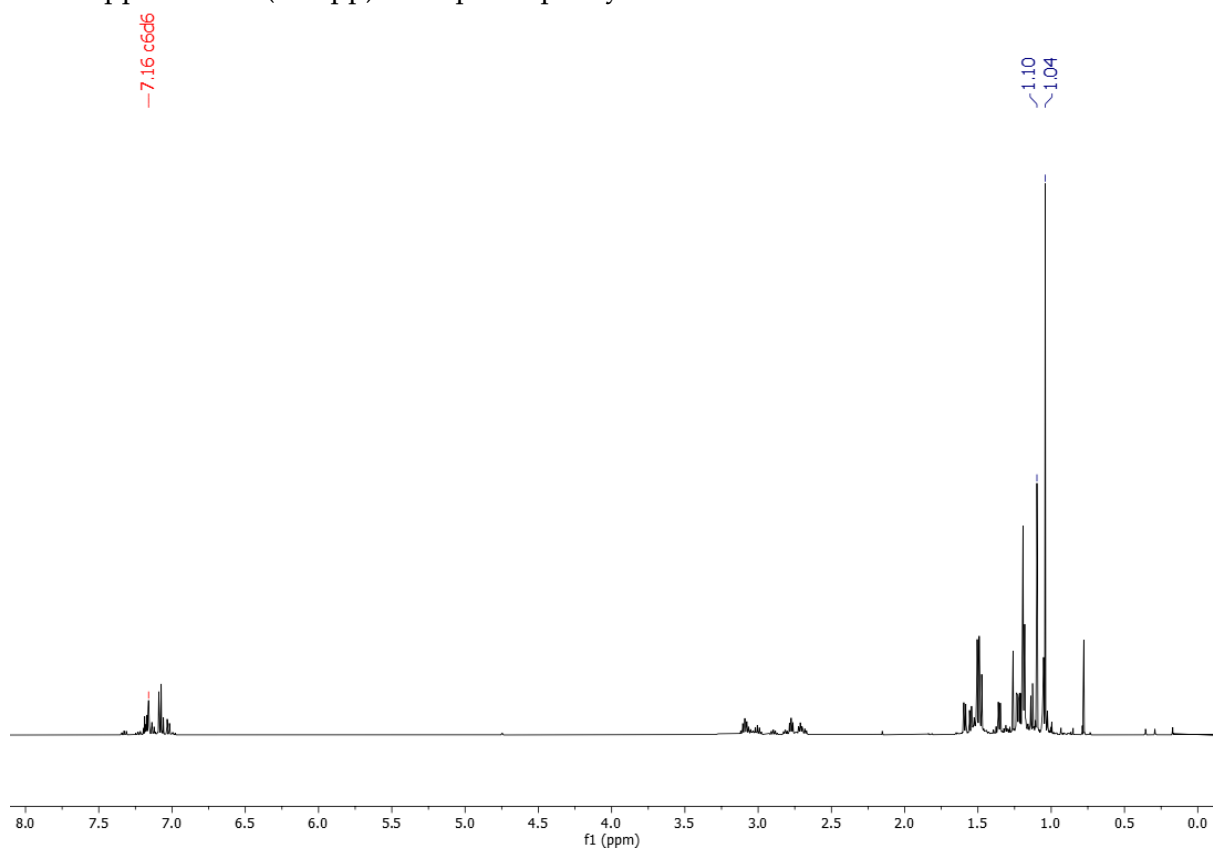

**Figure S4.** The  $^1\text{H}$  NMR spectrum (500 MHz,  $\text{C}_6\text{D}_6$ ) of the thermolysis of compound **1**.

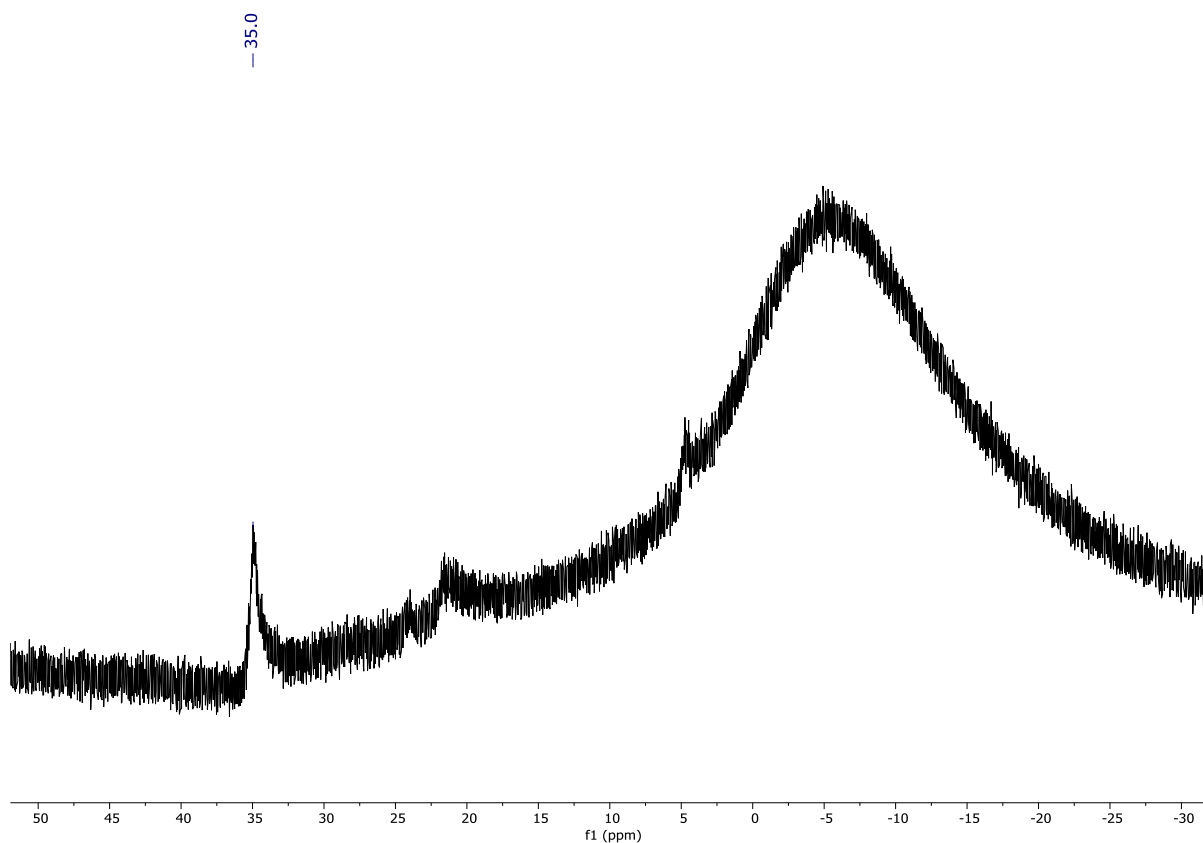

**Figure S5.** The  $^{11}\text{B}$  NMR spectrum (160 MHz,  $\text{C}_6\text{D}_6$ ) of the thermolysis of compound **1**.

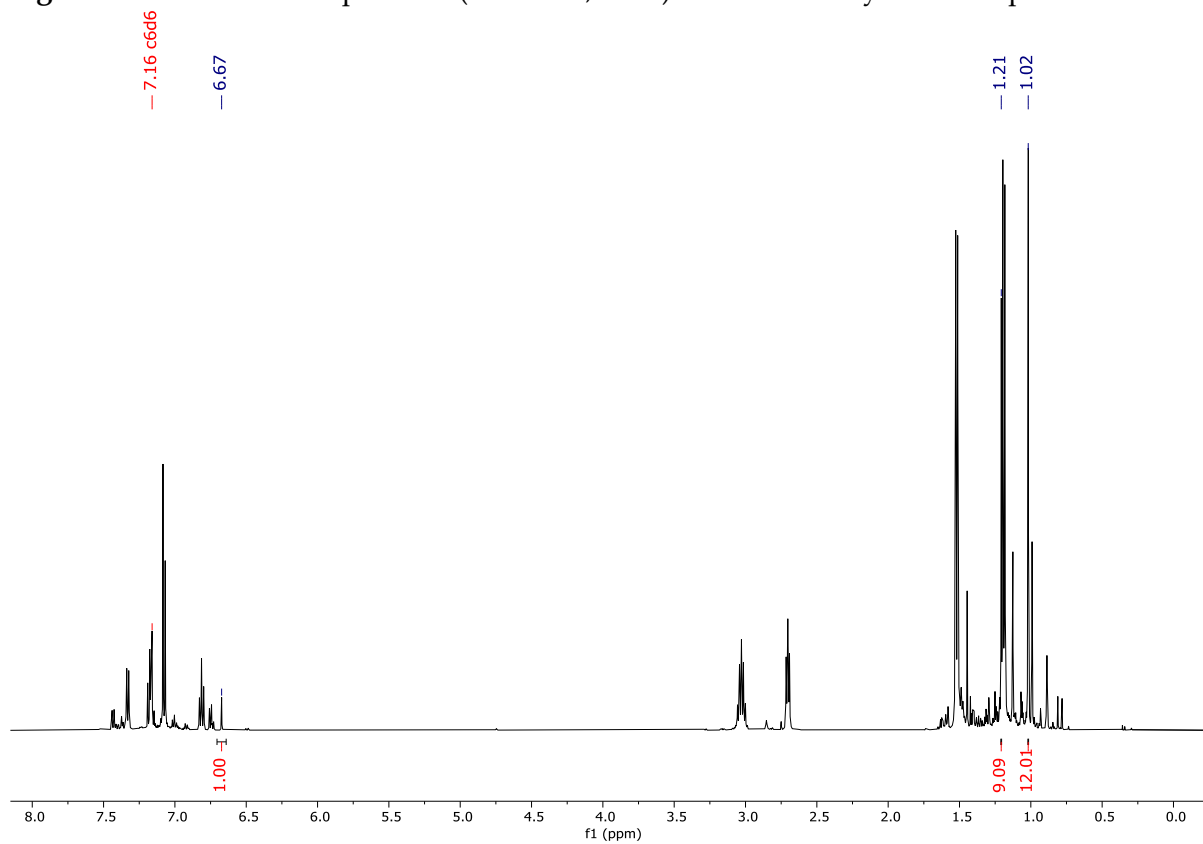

**Figure S6.** The  $^1\text{H}$  NMR spectrum (500 MHz,  $\text{C}_6\text{D}_6$ ) of the reaction of compound **1** with phenyl acetylene.

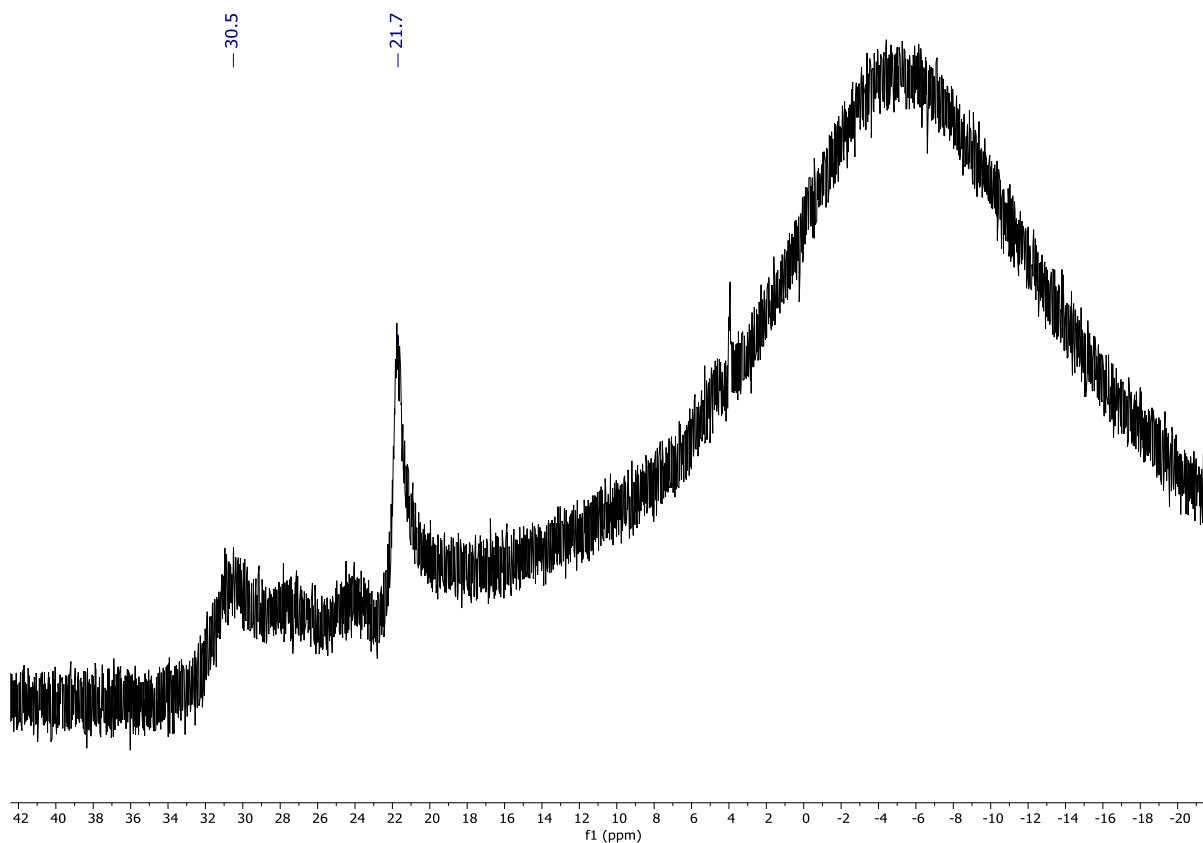

**Figure S7.** The  $^{11}\text{B}$  NMR spectrum (160 MHz,  $\text{C}_6\text{D}_6$ ) of the reaction of compound **1** with phenyl acetylene.

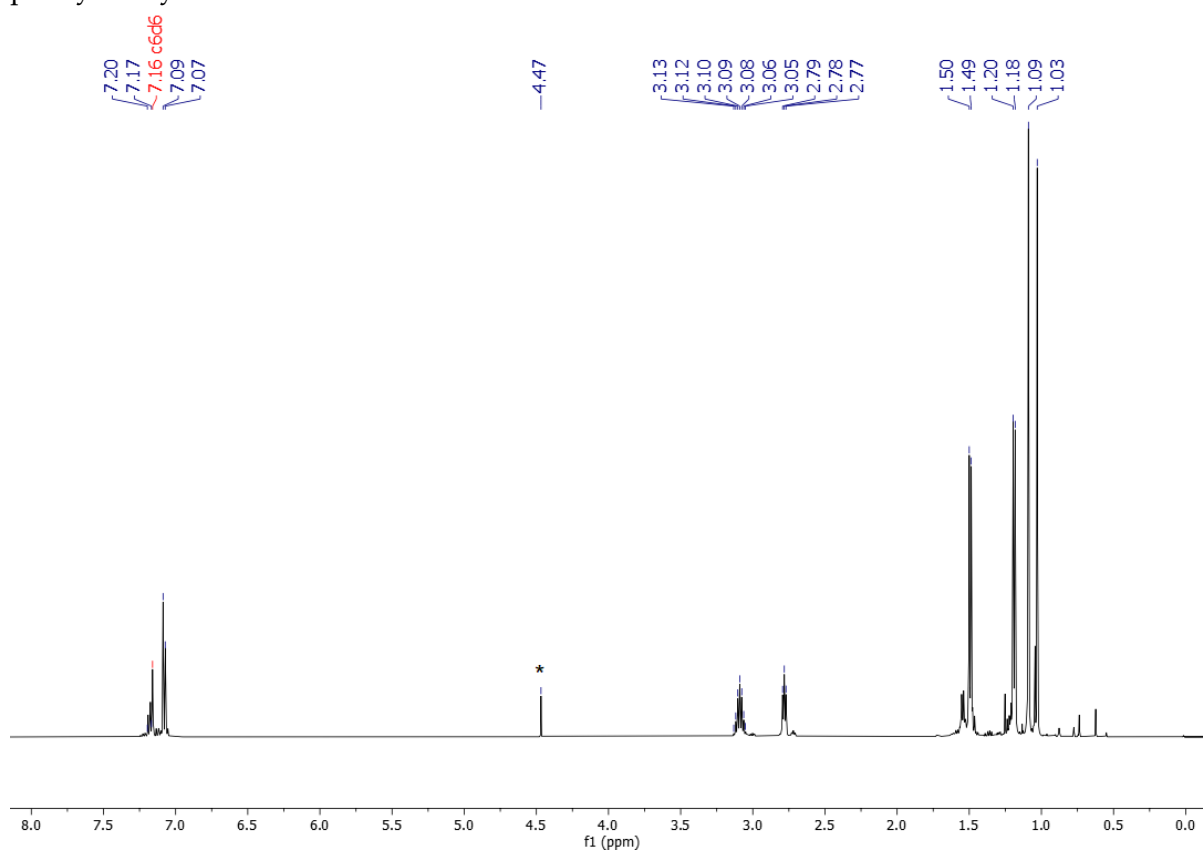

**Figure S8.** The  $^1\text{H}$  NMR spectrum (500 MHz,  $\text{C}_6\text{D}_6$ ) of compound **1** with  $\text{H}_2$  present in solution showing no reaction. \* = Hydrogen.



## NMR spectra of compounds 2 and 3

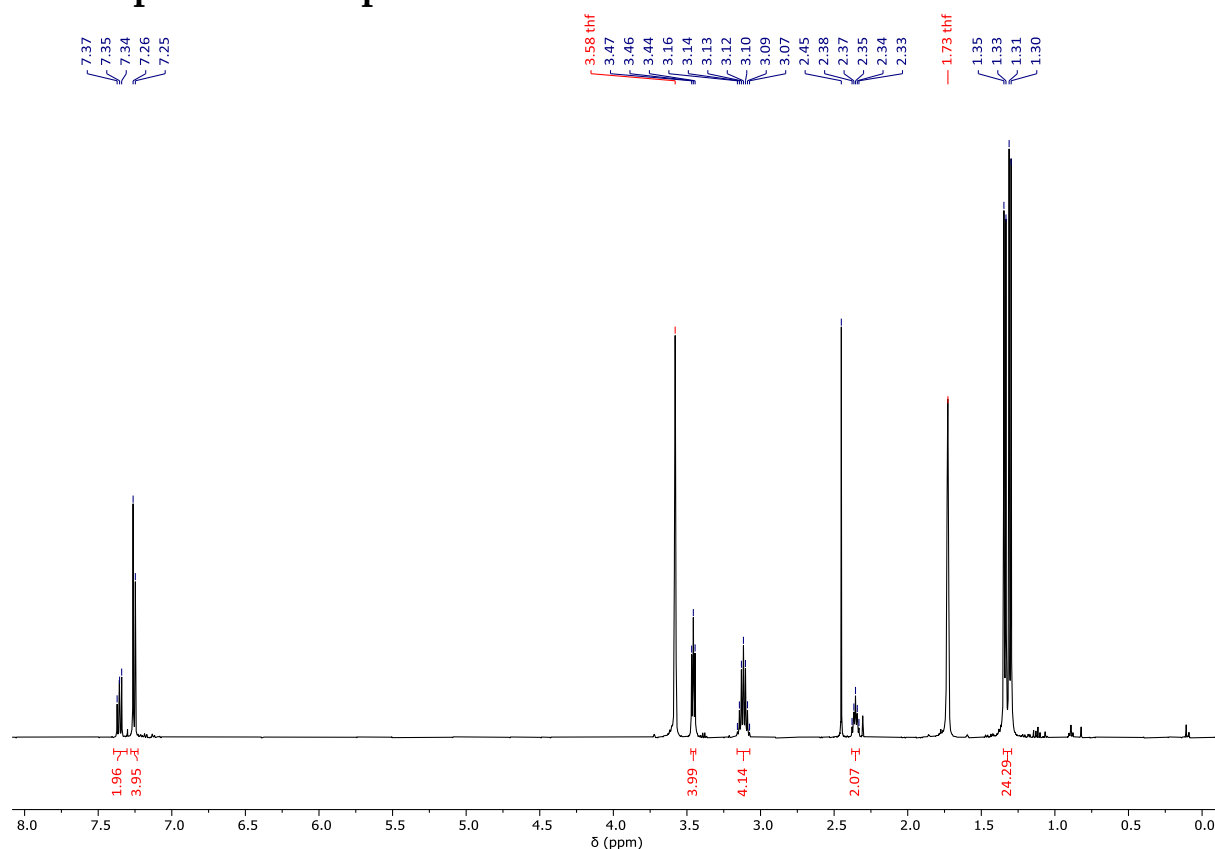

Figure S9. The <sup>1</sup>H NMR spectrum (500 MHz, *d*<sub>8</sub>-THF) of compound 2.

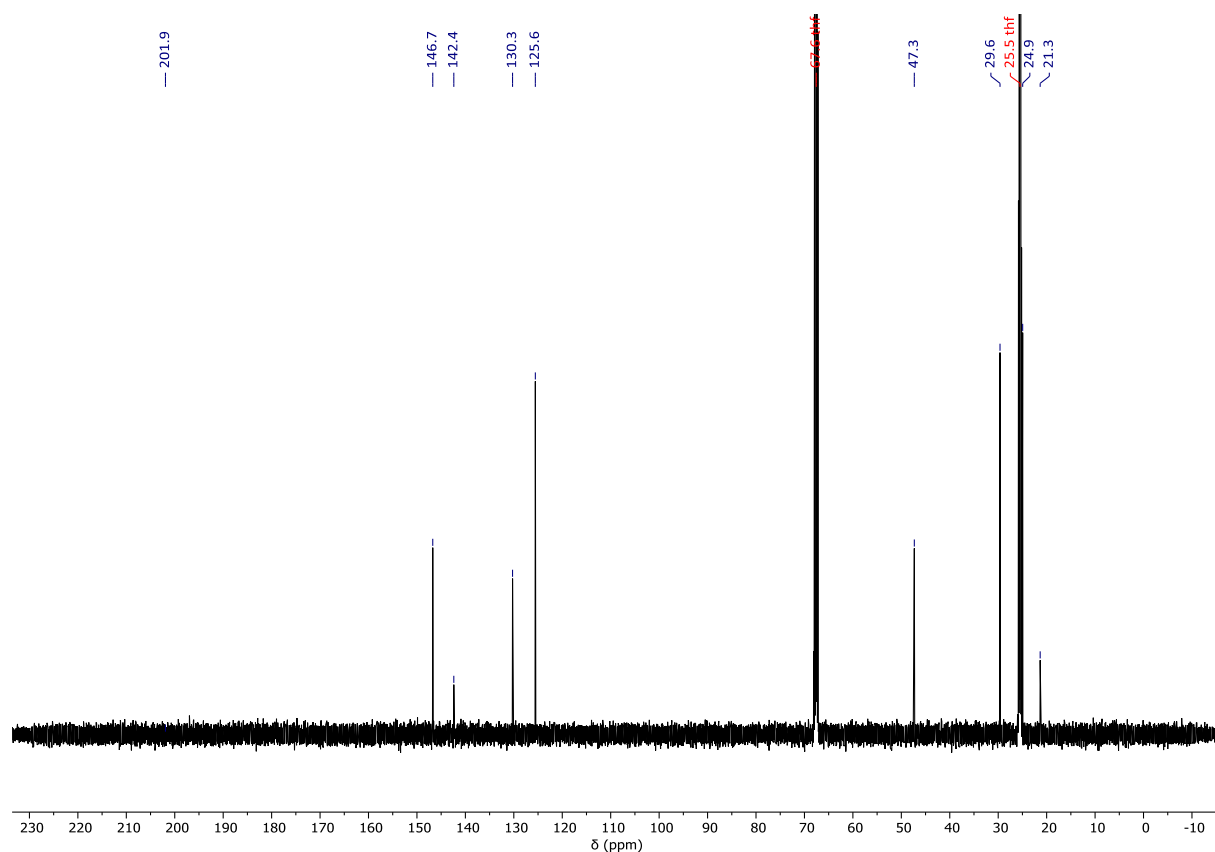

Figure S10. The <sup>13</sup>C{<sup>1</sup>H} NMR spectrum (126 MHz, *d*<sub>8</sub>-THF) of compound 2.

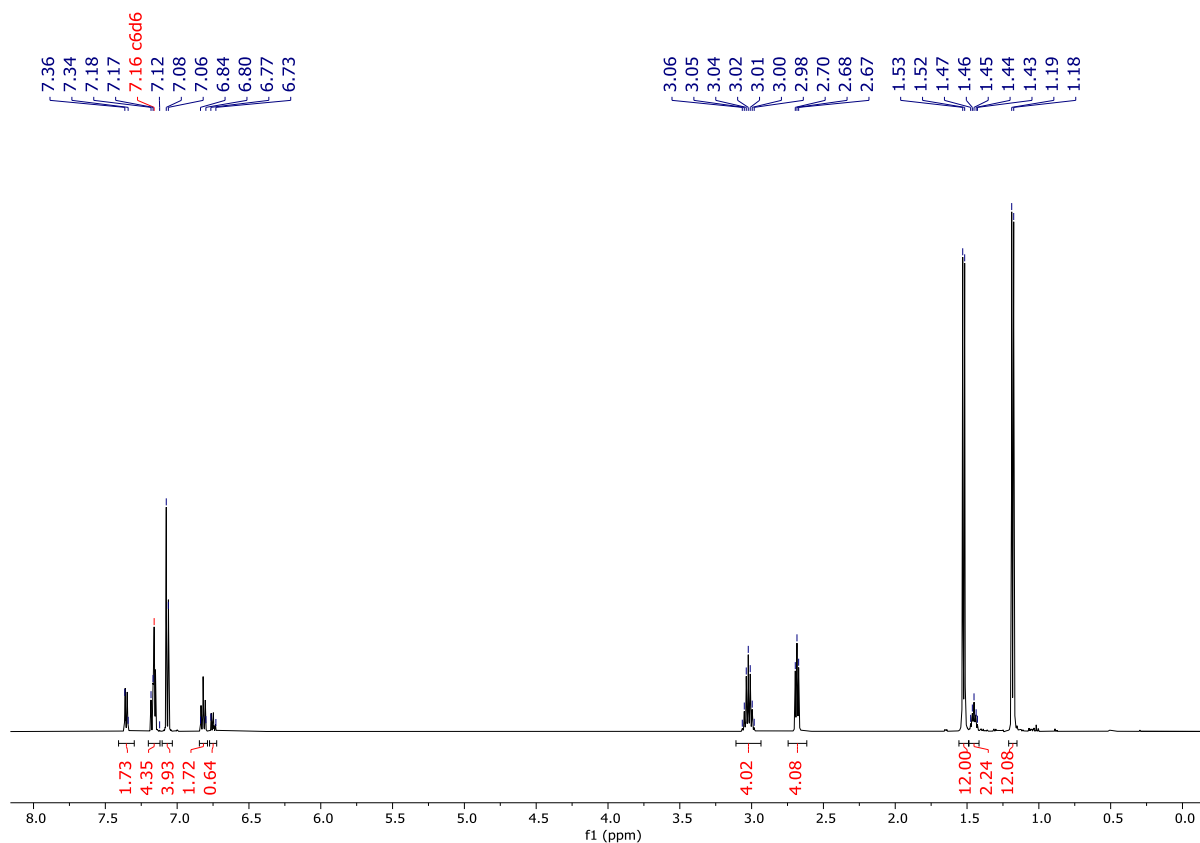

**Figure S11.** The <sup>1</sup>H NMR spectrum (500 MHz, C<sub>6</sub>D<sub>6</sub>) of compound **3**.

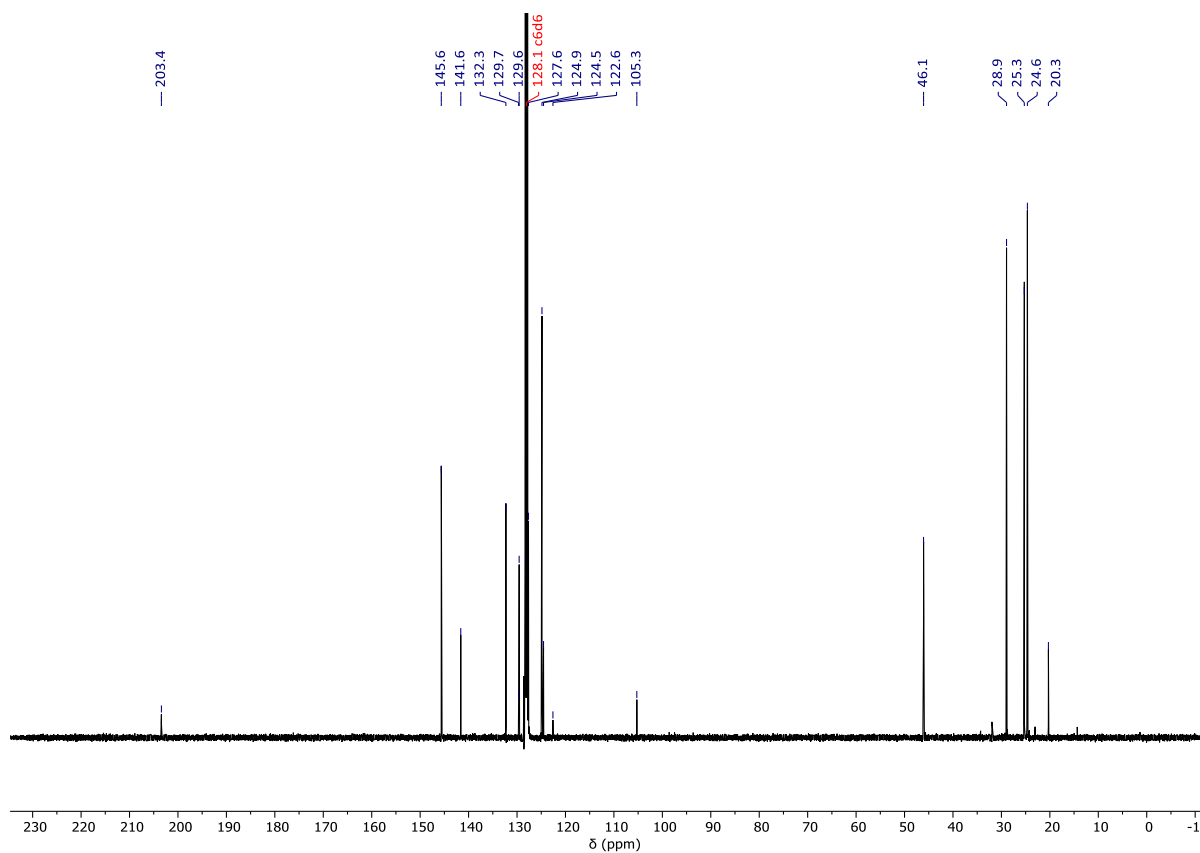

**Figure S12.** The <sup>13</sup>C{<sup>1</sup>H} NMR spectrum (126 MHz, C<sub>6</sub>D<sub>6</sub>) of compound **3**.

# Mass Spectrometry Data

Compound 1·H<sub>2</sub>O, (6-Dipp)CuC(B(OH)(pin)=N(H)'Bu

## Walkup MS Report

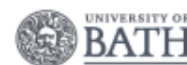

|                               |                            |                      |                     |
|-------------------------------|----------------------------|----------------------|---------------------|
| <b>Data File</b>              | RC359_Pos_5mins_MS_28707.d | <b>Sample Name</b>   | RC359               |
| <b>Sample Type</b>            | Sample                     | <b>Position</b>      | P1-A9               |
| <b>Instrument Name</b>        | 6545 QToF                  | <b>User Name</b>     | Rex Charman         |
| <b>Acq Method</b>             | Pos_5mins_MS.m             | <b>Acquired Time</b> | 05/07/2022 14:00:45 |
| <b>IRM Calibration Status</b> | Success                    | <b>DA Method</b>     | Pos_5mins_MS.m      |
| <b>Comment</b>                |                            |                      |                     |

|                                  |               |                                  |                                                          |
|----------------------------------|---------------|----------------------------------|----------------------------------------------------------|
| <b>Sample Group</b>              |               | <b>Info.</b>                     |                                                          |
| <b>Walkup Sample Description</b> | Toluene wash  | <b>Walkup Method</b>             | Pos_5mins_C18                                            |
| <b>Formula</b>                   | C39H63BCuN3O3 | <b>Walkup Method Description</b> | Positive mode ionization using C18 column chromatography |
| <b>Stream Name</b>               | LC 1          | <b>Acquisition SW Version</b>    | 6200 series TOF/6500 series Q-TOF B.09.00 (B9044.0)      |

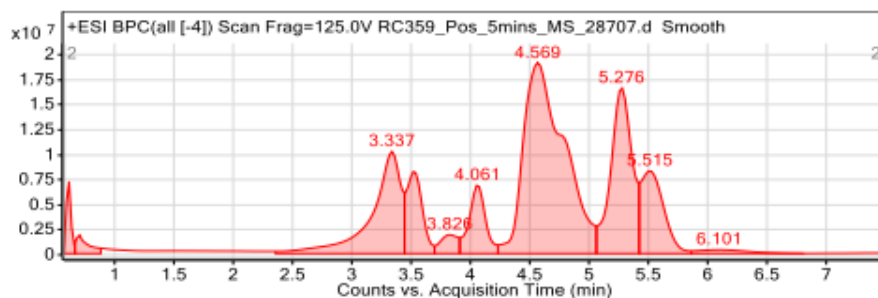

Figure 1: Base peak chromatogram

### User Chromatogram Peak List

| RT (min) | Area      | Area % | Area Sum (%) | Base Peak (m/z) | Width (min) |
|----------|-----------|--------|--------------|-----------------|-------------|
| 0.61     | 20866258  | 4.57   | 1.82         | 233.2244        | 0.048       |
| 0.70     | 12879699  | 2.82   | 1.12         | 187.1820        | 0.095       |
| 3.34     | 171967946 | 37.68  | 14.97        | 181.1723        | 0.230       |
| 3.53     | 75219861  | 16.48  | 6.55         | 187.1826        | 0.140       |
| 3.83     | 19332143  | 4.24   | 1.68         | 207.1872        | 0.154       |
| 4.06     | 65365723  | 14.32  | 5.69         | 195.1882        | 0.138       |
| 4.57     | 456393649 | 100.00 | 39.72        | 405.3358        | 0.346       |
| 5.28     | 205942044 | 45.12  | 17.92        | 480.4013        | 0.185       |
| 5.52     | 109866840 | 24.07  | 9.56         | 478.3926        | 0.202       |
| 6.10     | 11170324  | 2.45   | 0.97         | 233.1490        | 0.462       |

### Compound Table

| Compound Label            | RT (min) | Observed mass (m/z) | Neutral observed mass (Da) | Theoretical mass (Da) | Mass error (ppm) | Isotope match score (%) |
|---------------------------|----------|---------------------|----------------------------|-----------------------|------------------|-------------------------|
| Cpd 1: C39 H63 B Cu N3 O3 | 4.14     | 696.4360            | 694.4292                   | 694.4295              | -0.44            | 62.10                   |

Mass errors of between -5.00 and 5.00 ppm with isotope match scores above 60% are considered confirmation of molecular formulae

## Compound 2, (6-Dipp)CuCN

### Walkup MS Report

|                               |                                |                      |                     |
|-------------------------------|--------------------------------|----------------------|---------------------|
| <b>Data File</b>              | 6DippCuCN_Pos_5mins_MS_28719.d | <b>Sample Name</b>   | 6DippCuCN           |
| <b>Sample Type</b>            | Sample                         | <b>Position</b>      | P1-A5               |
| <b>Instrument Name</b>        | 6545 QToF                      | <b>User Name</b>     | Rex Charman         |
| <b>Acq Method</b>             | Pos_5mins_MS.m                 | <b>Acquired Time</b> | 7/5/2022 5:19:04 PM |
| <b>IRM Calibration Status</b> | Success                        | <b>DA Method</b>     | Pos_5mins_MS.m      |
| <b>Comment</b>                |                                |                      |                     |

|                                  |            |                                  |                                                          |
|----------------------------------|------------|----------------------------------|----------------------------------------------------------|
| <b>Sample Group</b>              |            | <b>Info.</b>                     |                                                          |
| <b>Walkup Sample Description</b> |            | <b>Walkup Method</b>             | Pos_5Mins_C18                                            |
| <b>Formula</b>                   | C29H40CuN3 | <b>Walkup Method Description</b> | Positive mode ionization using C18 column chromatography |

|                    |      |                               |                                                     |
|--------------------|------|-------------------------------|-----------------------------------------------------|
| <b>Stream Name</b> | LC 1 | <b>Acquisition SW Version</b> | 6200 series TOF/6500 series Q-TOF B.09.00 (B9044.0) |
|--------------------|------|-------------------------------|-----------------------------------------------------|

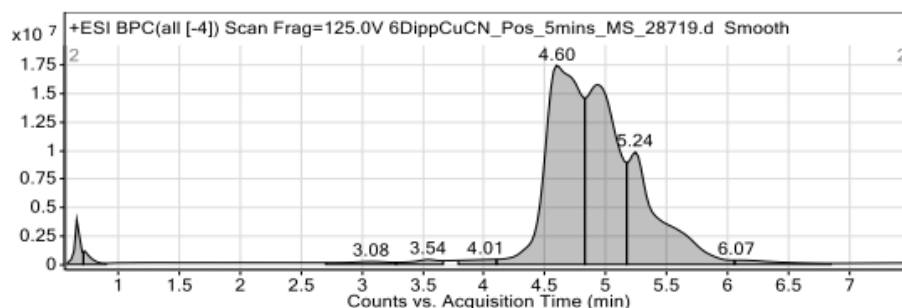

Figure 1: Base peak chromatogram

#### User Chromatogram Peak List

| RT (min) | Area      | Area % | Area Sum (%) | Base Peak (m/z) | Width (min) |
|----------|-----------|--------|--------------|-----------------|-------------|
| 0.67     | 12318326  | 3.47   | 1.43         | 144.9848        | 0.050       |
| 0.72     | 4974868   | 1.40   | 0.58         | 144.9848        | 0.070       |
| 3.08     | 6669146   | 1.88   | 0.78         | 194.1198        | 0.380       |
| 3.54     | 6777564   | 1.91   | 0.79         | 130.1608        | 0.220       |
| 4.01     | 7413934   | 2.09   | 0.86         | 233.1498        | 0.250       |
| 4.60     | 354888714 | 100.00 | 41.30        | 405.3333        | 0.270       |
| 4.93     | 274174060 | 77.26  | 31.90        | 962.5116        | 0.260       |
| 5.24     | 182357500 | 51.38  | 21.22        | 480.4010        | 0.240       |
| 6.07     | 9796505   | 2.76   | 1.14         | 233.1496        | 0.450       |

#### Compound Table

| Compound Label       | RT (min) | Observed mass (m/z) | Neutral observed mass (Da) | Theoretical mass (Da) | Mass error (ppm) | Isotope match score (%) |
|----------------------|----------|---------------------|----------------------------|-----------------------|------------------|-------------------------|
| Cpd 1: C29 H40 Cu N3 | 4.98     | 516.2423            | 493.2509                   | 493.2518              | -1.86            | 93.21                   |

Mass errors of between -5.00 and 5.00 ppm with isotope match scores above 60% are considered confirmation of molecular formulae

The reaction of compound 1 with phenyl acetylene,  $^1\text{NCH}_2$

## Walkup MS Report

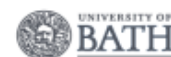

|                               |                                             |                      |                                 |
|-------------------------------|---------------------------------------------|----------------------|---------------------------------|
| <b>Data File</b>              | RC358_Pos_LoopInjection_MS_unbiased_28647.d | <b>Sample Name</b>   | RC358                           |
| <b>Sample Type</b>            | Sample                                      | <b>Position</b>      | P1-A1                           |
| <b>Instrument Name</b>        | 6545 QToF                                   | <b>User Name</b>     | Rex Charman                     |
| <b>Acq Method</b>             | Pos_LoopInjection_MS_unbiased.m             | <b>Acquired Time</b> | 01/07/2022 15:17:43             |
| <b>IRM Calibration Status</b> | Success                                     | <b>DA Method</b>     | Pos_LoopInjection_MS_unbiased.m |
| <b>Comment</b>                |                                             |                      |                                 |

|                                  |                            |                                  |                                                          |
|----------------------------------|----------------------------|----------------------------------|----------------------------------------------------------|
| <b>Sample Group</b>              |                            | <b>Info.</b>                     |                                                          |
| <b>Walkup Sample Description</b> | 6DippCuC(NtBu)BPIn + PhCCH | <b>Walkup Method</b>             | Pos_LoopInjection_Unbiased                               |
| <b>Formula</b>                   | C11H22BNO2                 | <b>Walkup Method Description</b> | Positive mode loop injection with unbiased isotope model |
| <b>Stream Name</b>               | LC 1                       | <b>Acquisition SW Version</b>    | 6200 series TOF/6500 series Q-TOF B.09.00 (B9044.0)      |

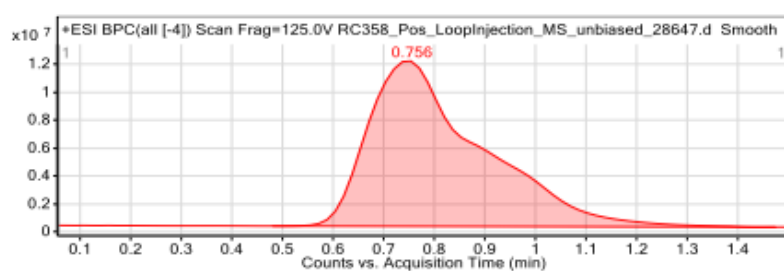

Figure 1: Base peak chromatogram

### User Chromatogram Peak List

| RT (min) | Area      | Area % | Area Sum (%) | Base Peak (m/z) | Width (min) |
|----------|-----------|--------|--------------|-----------------|-------------|
| 0.76     | 183533746 | 100.00 | 100.00       | 188.1433        | 0.244       |

### Compound Table

| Compound Label  | RT (min) | Observed mass (m/z) | Neutral observed mass (Da) | Theoretical mass (Da) | Mass error (ppm) | Isotope match score (%) |
|-----------------|----------|---------------------|----------------------------|-----------------------|------------------|-------------------------|
| Cpd 1: C5 H11 N | 0.75     | 86.0962             | 85.0890                    | 85.0891               | -2.26            | 72.75                   |

Mass errors of between -5.00 and 5.00 ppm with isotope match scores above 60% are considered confirmation of molecular formulae

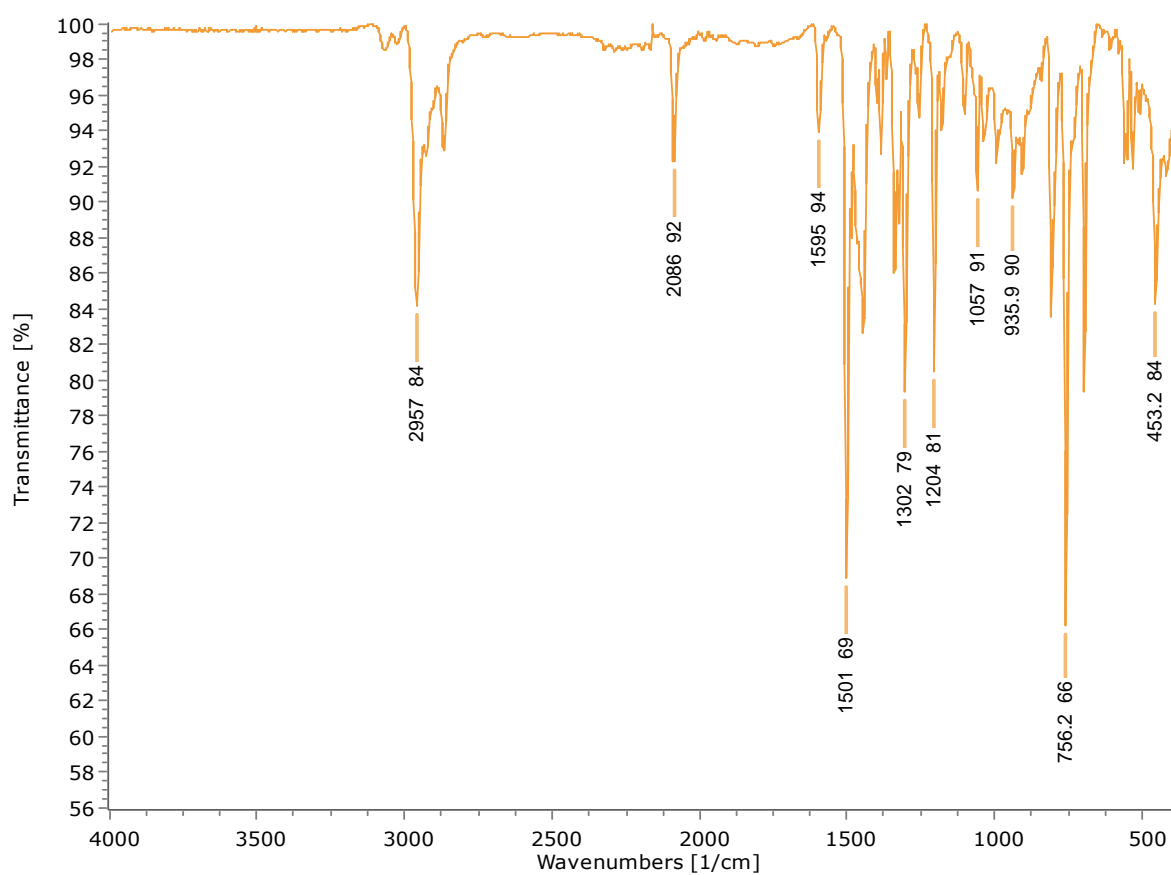

**Figure S13** The IR spectrum of compound 3.

## References

1. Dolomanov, O. V.; Bourhis, L. J.; Gildea, R. J.; Howard, J. A. K.; Puschmann, H., OLEX2: a complete structure solution, refinement and analysis program. *J. Appl. Crystallogr.* **2009**, 42 (2), 339-341.
2. Sheldrick, G., SHELXT - Integrated space-group and crystal-structure determination. *Acta Crystallogr., Sect. A* **2015**, 71 (1), 3-8.
